# Supplementary material
Source: ML conference proceedings conference paper supplement (https://openreview.net/forum?id=Jw34v_84m2b)
Supplement: supplementary_material [file attachment]

---

# IM-Loss: Information Maximization Loss for Spiking Neural Networks

---

Yufei Guo\*, Yuanpei Chen\*, Liwen Zhang, Xiaode Liu, Yinglei Wang, Xuhui Huang, Zhe Ma†  
Intelligent Science & Technology Academy of CASIC  
yfguo@pku.edu.cn, rop477@163.com, mazhe\_thu@163.com

## A Appendix

### A.1 Proofs of Zero Conditional Entropy

*Proof.*

$$I(U; O) = H(O) - H(O|U) \quad (1)$$

$$= \sum_{u,o} p(u,o) \log \frac{p(u,o)}{p(u)p(o)} \quad (2)$$

$$= \sum_{u,o} p(u,o) \log \frac{p(u,o)}{p(u)} - \sum_{u,o} p(u,o) \log p(o) \quad (3)$$

$$= \sum_{u,o} p(u) p_{O|U=u}(o) \log p_{O|U=u}(o) - \sum_{u,o} p(u,o) \log p(o) \quad (4)$$

$$= \sum_u p(u) \left( \sum_o p_{O|U=u}(o) \log p_{O|U=u}(o) \right) - \sum_o \left( \sum_u p(u,o) \right) \log p(o) \quad (5)$$

$$= - \sum_u p(u) H(O|U=u) - \sum_o p(o) \log p(o) \quad (6)$$

$$= -H(O|U) + H(O) \quad (7)$$

In above equations,  $p(u)$ ,  $p(o)$  and  $p(u, o)$  are the marginal probability mass functions of the discrete variables  $U$ ,  $O$  and their joint probability mass function. The conditional entropy  $H(O|U)$  can be expressed as the below equation according to the Eq.5 and Eq.7.

$$H(O|U) = \sum_u p(u) \left( \sum_o p_{O|U=u}(o) \log p_{O|U=u}(o) \right) \quad (8)$$

Since every  $u$  is corresponding to a fixed spike 0 or 1,  $p_{O|U=u} = 0$  or 1. So we have

$$H(O|U) = \sum_u p(u) (0 + 0 + \dots + 0) = 0 \quad (9)$$

Then maximizing the mutual information  $I(U; O)$  is equivalent to maximizing the information entropy  $H(O)$ :

---

\*Equal Contributions.

†Corresponding author.

$$\arg \max_{U, O} I(U; O) = H(O) \quad (10)$$

## A.2 Algorithm

The proposed training algorithm of an SNN is presented in Algo.1.

---

**Algorithm 1** The proposed training algorithm of an SNN.

---

**Input:** Initialized SNN; training dataset; total training epochs,  $I$ ; training iterations per epoch,  $J$ .

**Output:** The trained SNN.

- 1: **for** all  $i = 1, 2, \dots, I$ -th epoch **do**
  - 2:   **for** all  $j = 1, 2, \dots, J$ -th iteration **do**
  - 3:     **Forward propagation:**
  - 4:     Compute classification loss  $\mathcal{L}_{CE}^j$ .
  - 5:     **for** all  $l = 1, 2, \dots, (L - 1)$ -th layers (IM-Loss is not added for the last output layer.) **do**
  - 6:       Compute  $\bar{U}_l$  for  $l$ -th layer.
  - 7:     **end for**
  - 8:     Compute IM-Loss  $\mathcal{L}_{IM}^j$ .
  - 9:     Compute overall loss  $\mathcal{L}_{Total}^j$ .
  - 10:    **Back propagation:**
  - 11:    Update the  $g'(\cdot)$  via ESG:
  - 12:     $g'(x) = \frac{1}{2}K(i)(1 - \tanh(K(i)(x - V_{th}))^2)$
  - 13:    Calculate the gradients w.r.t.  $\mathbf{W}$ :
  - 14:     $\frac{\partial \mathcal{L}_{Total}^j}{\partial \mathbf{W}} = \sum_{t=1}^T \frac{\partial \mathcal{L}_{Total}^j}{\partial y^t} g'(u^t) \frac{\partial u^t}{\partial \mathbf{W}}$ , where  $y^t$  and  $u^t$  denote the target output and membrane potential at  $t$ -th timestep.
  - 15:    **Parameters Update**
  - 16:    Update  $\mathbf{W}$  :  $\mathbf{W} = \mathbf{W} - \eta \frac{\partial \mathcal{L}_{Total}^j}{\partial \mathbf{W}}$ , where  $\eta$  is learning rate.
  - 17:    **end for**
  - 18: **end for**
  - 19: **return** the trained SNN.
-
